# Supplementary material for: A continuous porous porphyrinic polymer thin-film composite membrane for anti-biofouling and molecular sieving
Source: Royal Society of Chemistry journal article supplement (doi:10.1039/d4ta04510f), 2024-01-01
Supplement: d4ta04510f1.pdf [file d4ta04510f1.pdf]

## Electronic Supplementary Information

### Continuous Porous Porphyrinic Polymer Thin-Film Composite

#### Membrane for Anti-biofouling and Molecular Sieving

Jia Xu,<sup>\*a</sup> Hansi Zhang,<sup>a</sup> Xiaolong Ren,<sup>a</sup> Shiyi Yao<sup>a</sup>, Wenhua Fan<sup>a</sup> Ayman Nafady,<sup>c</sup>

Abdullah M. Al-Enizi,<sup>c</sup> Shengqian Ma<sup>\*b</sup>

- a. Key Laboratory of Marine Chemistry Theory and Technology, Ministry of Education, College of Chemistry and Chemical Engineering, Ocean University of China, Qingdao, Shandong, 266100, China. E-mail: qdxujia@sina.com.cn.
- b. Department of Chemistry, University of North Texas, 1508 W Mulberry St, Denton, TX, 76201, USA. E-mail: Shengqian.Ma@unt.edu.
- c. Department of Chemistry, College of Science, King Saud University, Riyadh 11451, Saudi Arabia.

## **Data Availability Statements**

**Table S1:** Water permeance of TAPP<sub>n</sub>-TPC/PAN at different TAPP concentrations.

**Table S2:** A<sub>p</sub> of TAPP<sub>n</sub>-TPC/PAN at different TAPP concentrations.

**Table S3:** RB rejection of TAPP<sub>n</sub>-TPC/PAN at different TAPP concentrations.

**Table S4:** Comparison of dye rejection performance between the membrane prepared in this study and previously reported membranes

**Table S5:** Comparison of antibacterial performance between the membrane prepared in this study and previously reported membranes

**Data Availability Statements:**

In order to study the performance of the membrane, the water permeance and Rose Bengal(RB) rejection rate of the membrane were measured. At least three membrane samples of the same specifications were measured in parallel, and each sample was tested continuously for three cycles. The average data of the three samples in each cycle is shown in the table below.

Table S1 shows the water permeance of TAPP<sub>n</sub>-TPC/PAN at different TAPP concentrations. Table S2 shows the absorption of the permeate solutions ( $A_p$ ) of TAPP<sub>n</sub>-TPC/PAN at different TAPP concentrations. The maximum absorption wavelength of RB exists at 552nm, and the concentration of RB in feed solutions ( $C_F$ ) is fixed at 20 mg L<sup>-1</sup>, when the RB rejection is determined, and the absorption of RB in the feed solutions ( $A_F$ ) at 552 nm is 0.76. Table S3 shows the RB rejection of TAPP<sub>n</sub>-TPC/PAN at different TAPP concentrations. The RB rejection is calculated from the rate of change in the concentration of RB in the feed solutions and in the permeate solutions, where the concentration in the permeate solutions ( $C_p$ ) is calculated from the absorption of the measured RB at 552 nm in the permeate solutions.

**Table S1.** Water permeance of TAPP<sub>n</sub>-TPC/PAN at different TAPP concentrations

| Performance<br>Membrane      | Water permeance (P, L m <sup>-2</sup> h <sup>-1</sup> bar <sup>-1</sup> ) |         |         |       |
|------------------------------|---------------------------------------------------------------------------|---------|---------|-------|
|                              | Cycle 1                                                                   | Cycle 2 | Cycle 3 | Mean  |
| TAPP <sub>2.4</sub> -TPC/PAN | 13.29                                                                     | 13.26   | 13.20   | 13.25 |
| TAPP <sub>2.8</sub> -TPC/PAN | 11.63                                                                     | 11.66   | 11.65   | 11.65 |
| TAPP <sub>3.2</sub> -TPC/PAN | 9.18                                                                      | 9.26    | 9.16    | 9.20  |
| TAPP <sub>3.6</sub> -TPC/PAN | 8.82                                                                      | 8.80    | 8.80    | 8.81  |
| TAPP <sub>4.0</sub> -TPC/PAN | 8.24                                                                      | 8.27    | 8.22    | 8.24  |
| TAPP <sub>4.4</sub> -TPC/PAN | 5.43                                                                      | 5.48    | 5.41    | 5.44  |

**Table S2.** A<sub>P</sub> of TAPP<sub>n</sub>-TPC/PAN at different TAPP concentrations

| Absorption<br>Membrane       | Absorption of the permeate solutions (A <sub>P</sub> ) |         |         |        |
|------------------------------|--------------------------------------------------------|---------|---------|--------|
|                              | Cycle 1                                                | Cycle 2 | Cycle 3 | Mean   |
| TAPP <sub>2.4</sub> -TPC/PAN | 0.0320                                                 | 0.0318  | 0.0317  | 0.0319 |
| TAPP <sub>2.8</sub> -TPC/PAN | 0.0160                                                 | 0.0159  | 0.0162  | 0.0160 |
| TAPP <sub>3.2</sub> -TPC/PAN | 0.0135                                                 | 0.0132  | 0.0131  | 0.0133 |
| TAPP <sub>3.6</sub> -TPC/PAN | 0.0095                                                 | 0.0093  | 0.0092  | 0.0093 |
| TAPP <sub>4.0</sub> -TPC/PAN | 0.0040                                                 | 0.0038  | 0.0036  | 0.0038 |
| TAPP <sub>4.4</sub> -TPC/PAN | 0.0087                                                 | 0.0088  | 0.0089  | 0.0088 |

**Table S3.** RB rejection of TAPP<sub>n</sub>-TPC/PAN at different TAPP concentrations

| Rejection<br>Membrane        | Concentration in the permeate solutions<br>(C <sub>P</sub> , mg L <sup>-1</sup> ) |         |         |       | RB<br>Rejection<br>(%) |
|------------------------------|-----------------------------------------------------------------------------------|---------|---------|-------|------------------------|
|                              | Cycle 1                                                                           | Cycle 2 | Cycle 3 | Mean  |                        |
| TAPP <sub>2.4</sub> -TPC/PAN | 0.842                                                                             | 0.837   | 0.834   | 0.838 | 95.81                  |
| TAPP <sub>2.8</sub> -TPC/PAN | 0.421                                                                             | 0.418   | 0.426   | 0.422 | 97.89                  |
| TAPP <sub>3.2</sub> -TPC/PAN | 0.355                                                                             | 0.347   | 0.345   | 0.349 | 98.25                  |
| TAPP <sub>3.6</sub> -TPC/PAN | 0.250                                                                             | 0.245   | 0.242   | 0.246 | 98.77                  |
| TAPP <sub>4.0</sub> -TPC/PAN | 0.105                                                                             | 0.100   | 0.095   | 0.100 | 99.50                  |
| TAPP <sub>4.4</sub> -TPC/PAN | 0.229                                                                             | 0.232   | 0.234   | 0.232 | 98.84                  |

**Table S4.** Comparison of dye rejection performance between the membrane prepared in this study and previously reported membranes

| Membrane                     | Dye            | Dye Molecular Weight (g mol <sup>-1</sup> ) | Rejection (%) | Ref.      |
|------------------------------|----------------|---------------------------------------------|---------------|-----------|
| TMC-MPD                      | Rose Bengal    | 1018                                        | 99.0          | 1         |
| TMC-PPD                      | Rose Bengal    | 1018                                        | 97.5          |           |
| S-rGO                        | Direct Red 80  | 1373                                        | 99.0          | 2         |
| rGO/S-GO                     | Methylene Blue | 320                                         | 99.5          | 3         |
| P-rGO/ZnO                    | Direct Red 80  | 1373                                        | 98.8          | 4         |
|                              | Uniblue A      | 506                                         | 89 ± 2.6      |           |
|                              | Methylene Blue | 320                                         | 60 ± 2.4      |           |
| (FPA/PI) <sub>XA</sub>       | Rhodamine B    | 479                                         | 99.4          | 5         |
|                              | Rose Bengal    | 1018                                        | 99.7          |           |
| TAPP <sub>4.0</sub> -TPC/PAN | Rose Bengal    | 1018                                        | 99.5          | This work |
|                              | Chromotrope FB | 502                                         | 36.3          |           |
|                              | Methylene Blue | 320                                         | 0             |           |

**Table S5.** Comparison of antibacterial performance between the membrane prepared in this study and previously reported membranes

| Membrane                     | Antibacterial efficiency (Eb)                                                              | Ref.      |
|------------------------------|--------------------------------------------------------------------------------------------|-----------|
| 1 wt% NBNPs/PES              | 88.0% and 90.0% Eb against E. coli and S. aureus cells, respectively, after 12 h contact   | 6         |
| GOQDs/PVDF                   | 88.9% and 77.9% Eb against E. coli and S. aureus cells, respectively, after 1 h contact    | 7         |
| GO-Ag/CA                     | 86% Eb against E. coli after 2 h contact                                                   | 8         |
| PDA-rGOC3/HPAN               | 97.9% Eb against E. coli after 3 h contact                                                 | 9         |
| BAIE-TMC                     | 98.5 % and 98.4 % Eb against E. coli and S. aureus cells, respectively, after 48 h contact | 10        |
| PSf/PDA-AM                   | 98.5 % and 98.4 % Eb against E. coli and S. aureus cells, respectively, after 24 h contact | 11        |
| TAPP <sub>4.0</sub> -TPC/PAN | 99.3% and 85.9% Eb against E. coli and S. aureus cells, respectively, after 0.5 h contact  | This work |

## Reference:

1. E. Maaskant, W. Vogel, T. J. Dingemans and N. E. Benes, *Journal of Membrane Science*, 2018, **567**, 321-328.
2. L. Huang, S. Huang, S. R. Venna and H. Lin, *Environmental Science and Technology*, 2018, **52**, 12649-12655.
3. Peng, Zhang, Ji-Lai, Gong, Guang-Ming, Zeng, Biao, Song and Siyuan, *Separation & Purification Technology*, 2019.
4. N. A. Mazlan, A. Lewis, Z. Chen, F. S. Butt, J. Han, N. Radacsi, S. Yang and Y. Huang, *Journal of Membrane Science*, 2024, **697**, 122539.
5. Y. Guo, S. Li, B. Su and B. Mandal, *Chemical Engineering Journal*, 2019, **369**, 498-510.
6. S. Dadari, M. Rahimi and S. Zinadini, *Chemical Engineering Journal*, 2022, **431**, 134116.
7. Z. Zeng, D. Yu, Z. He, J. Liu, F. X. Xiao, Y. Zhang, R. Wang, D. Bhattacharyya and T. T. Y. Tan, *Scientific Reports*, 2016, **6**, 20142.
8. *Chemical Engineering Journal*, 2015, **281**, 53-59.
9. J. Zhu, J. Wang, A. A. Uliana, M. Tian, Y. Zhang, Y. Zhang, A. Volodin, K. Simoens, S. Yuan and J. Li, *Acs Applied Materials & Interfaces*, 2017, 28990.
10. H. Chen, F. Zhao, X. Zhang, H.-D. Park, Z. Li and L. Yang, *Journal of Membrane Science*, 2024, **707**, 122992.
11. L. Xu, Z. Pang, H. Yu, M. Guo, X. Yan, X. Jiang and L. Yu, *Desalination*, 2023, **565**, 116809.
